# Supplementary material
Source: MDPI journal article supplement (https://www.mdpi.com/2304-6740/11/6/238)
Supplement: s1 [file s1]

# Supporting Information

## Improved Oxide Ion Conductivity of Hexagonal Perovskite-Related Oxides $\text{Ba}_3\text{W}_{1+x}\text{V}_{1-x}\text{O}_{8.5+x/2}$

Yugo Kikuchi <sup>1,†</sup>, Yuta Yasui <sup>1,†</sup>, James R. Hester <sup>2</sup> and Masatomo Yashima <sup>1,†,\*</sup>

<sup>1</sup> Department of Chemistry, School of Science, Tokyo Institute of Technology, 2-12-1 W4-17 O-okayama, Meguro-ku, Tokyo 152-8551, Japan

<sup>2</sup> Australian Centre for Neutron Scattering, Australian Nuclear Science and Technology Organisation (ANSTO), Locked Bag 2001, Kirrawee DC, NSW, 2232, Australia

<sup>†</sup> These authors contributed equally to this work.

\* Correspondence: yashima@cms.titech.ac.jp

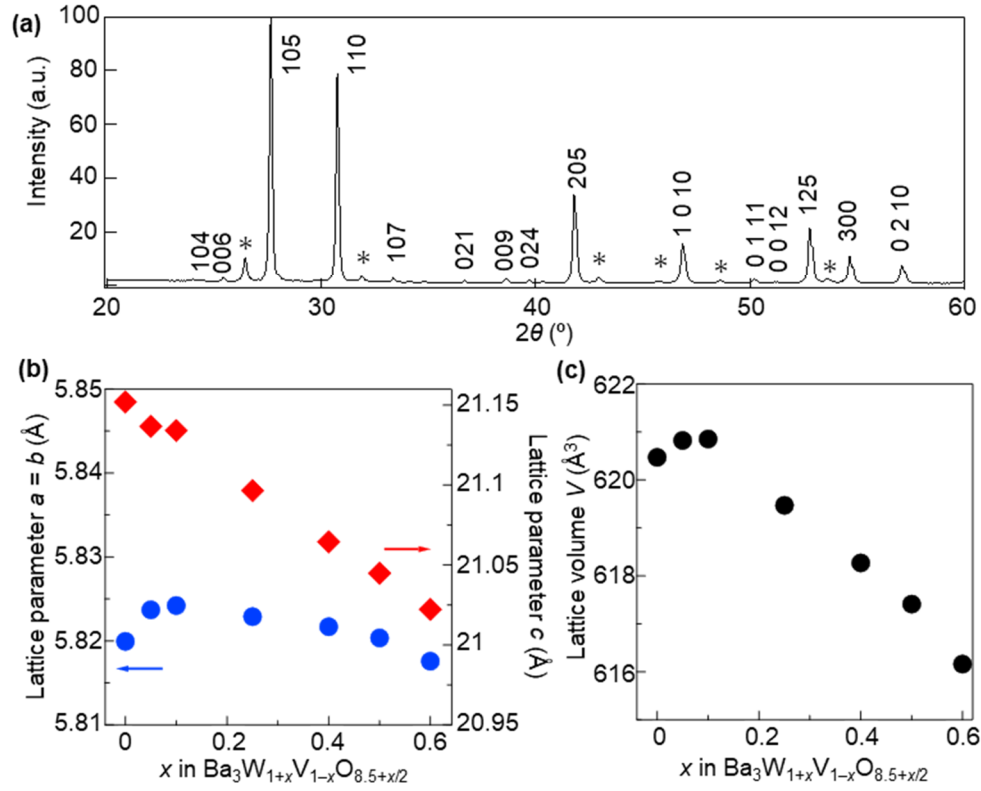

**Figure S1. X-ray powder diffraction pattern of  $\text{Ba}_3\text{W}_{1.6}\text{V}_{0.4}\text{O}_8$ , lattice parameters and lattice volume of  $\text{Ba}_3\text{W}_{1+x}\text{V}_{1-x}\text{O}_{8.5+x/2}$  as functions of excess W content  $x$ .** (a) X-ray powder diffraction pattern of  $\text{Ba}_3\text{W}_{1.6}\text{V}_{0.4}\text{O}_{8.8}$  sample.  $hkl$  denotes the reflection index of the main rhombohedral phase based on the hexagonal setting. The asterisk symbol represents peak position from a small amount of impurity phase  $\text{BaWO}_4$ . (b) Lattice parameters and (c) lattice volume of  $\text{Ba}_3\text{W}_{1+x}\text{V}_{1-x}\text{O}_{8.5+x/2}$  ( $x = 0, 0.05, 0.1, 0.25, 0.4, 0.5, 0.6$  and  $0.75$ ) as a function of the excess W content  $x$ . The error bars in (b) and (c) are within the symbols.

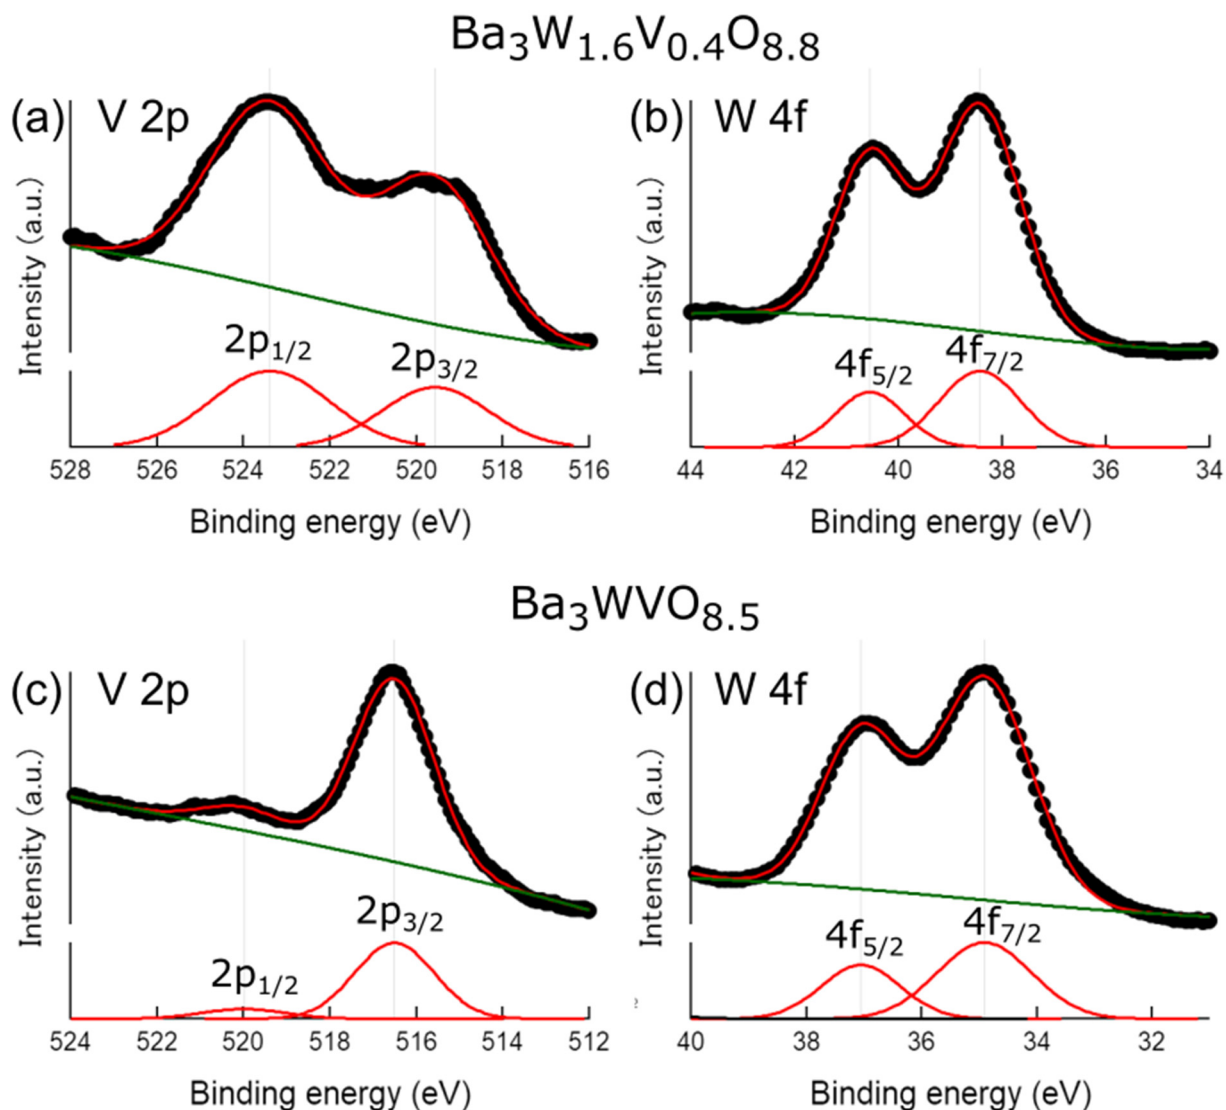

**Figure S2. XPS spectra of  $\text{Ba}_3\text{W}_{1.6}\text{V}_{0.4}\text{O}_{8.8}$  and  $\text{Ba}_3\text{WVO}_{8.5}$ .** (a) V 2p and (b) W 4f XPS spectra of  $\text{Ba}_3\text{W}_{1.6}\text{V}_{0.4}\text{O}_{8.8}$  and (c) V 2p and (d) W 4f spectra of  $\text{Ba}_3\text{WVO}_{8.5}$ . For each panel, black points, red solid lines, and green lines represent observed intensities, fitted curves, and background, respectively. The binding energies of W and V in the measured samples are, respectively, close to the values of  $\text{W}^{6+}$  in  $\text{WO}_3$  and  $\text{V}^{5+}$  in  $\text{V}_2\text{O}_5$  [1–3]. Therefore, the oxidation states of W and V in  $\text{Ba}_3\text{WVO}_{8.5}$  and  $\text{Ba}_3\text{W}_{1.6}\text{V}_{0.4}\text{O}_{8.8}$  are assigned to be  $\text{W}^{6+}$  and  $\text{V}^{5+}$ .

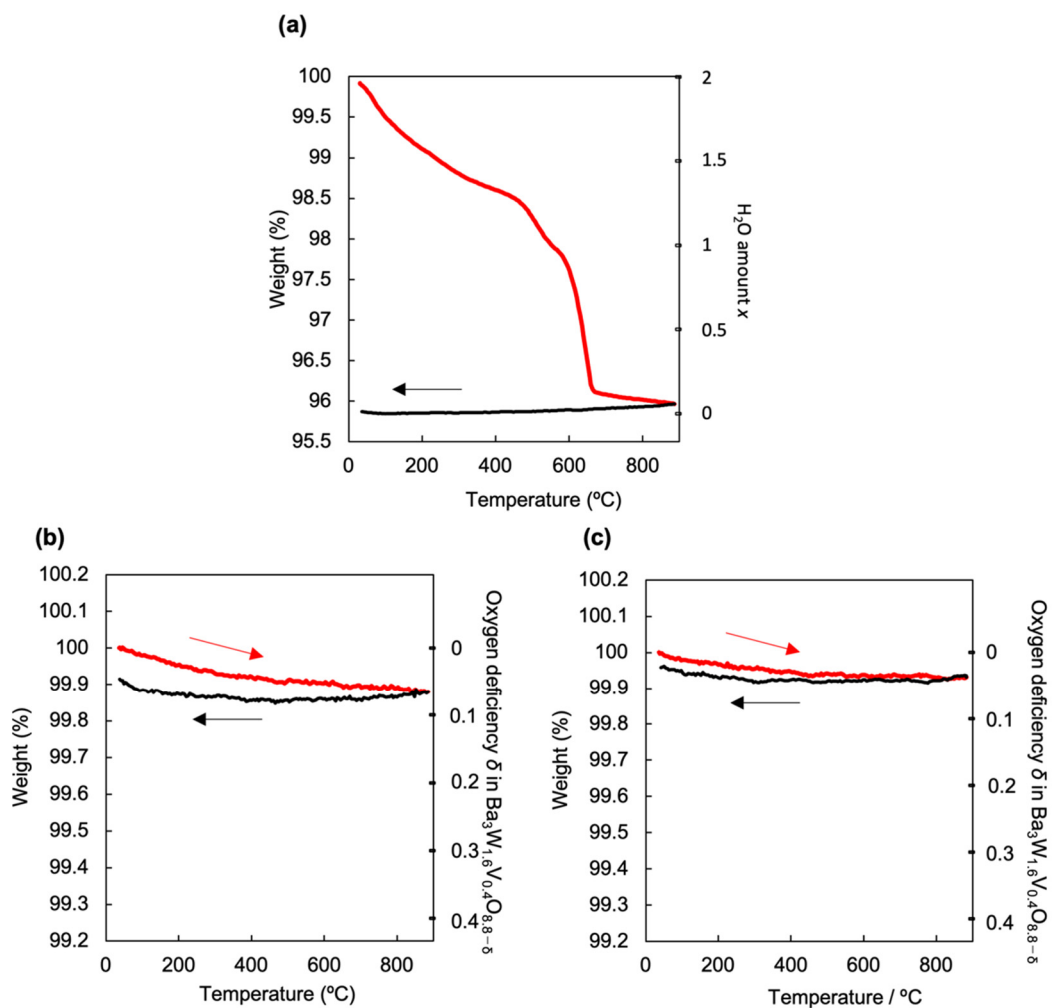

**Figure S3.** Thermogravimetric (TG) curves of  $\text{Ba}_3\text{W}_{1.6}\text{V}_{0.4}\text{O}_{8.8}$  in dry air at (a) 1st, (b) 2nd, and (c) 3rd cycles. Similar TG data were obtained also for  $\text{Ba}_3\text{WVO}_{8.5}$ .

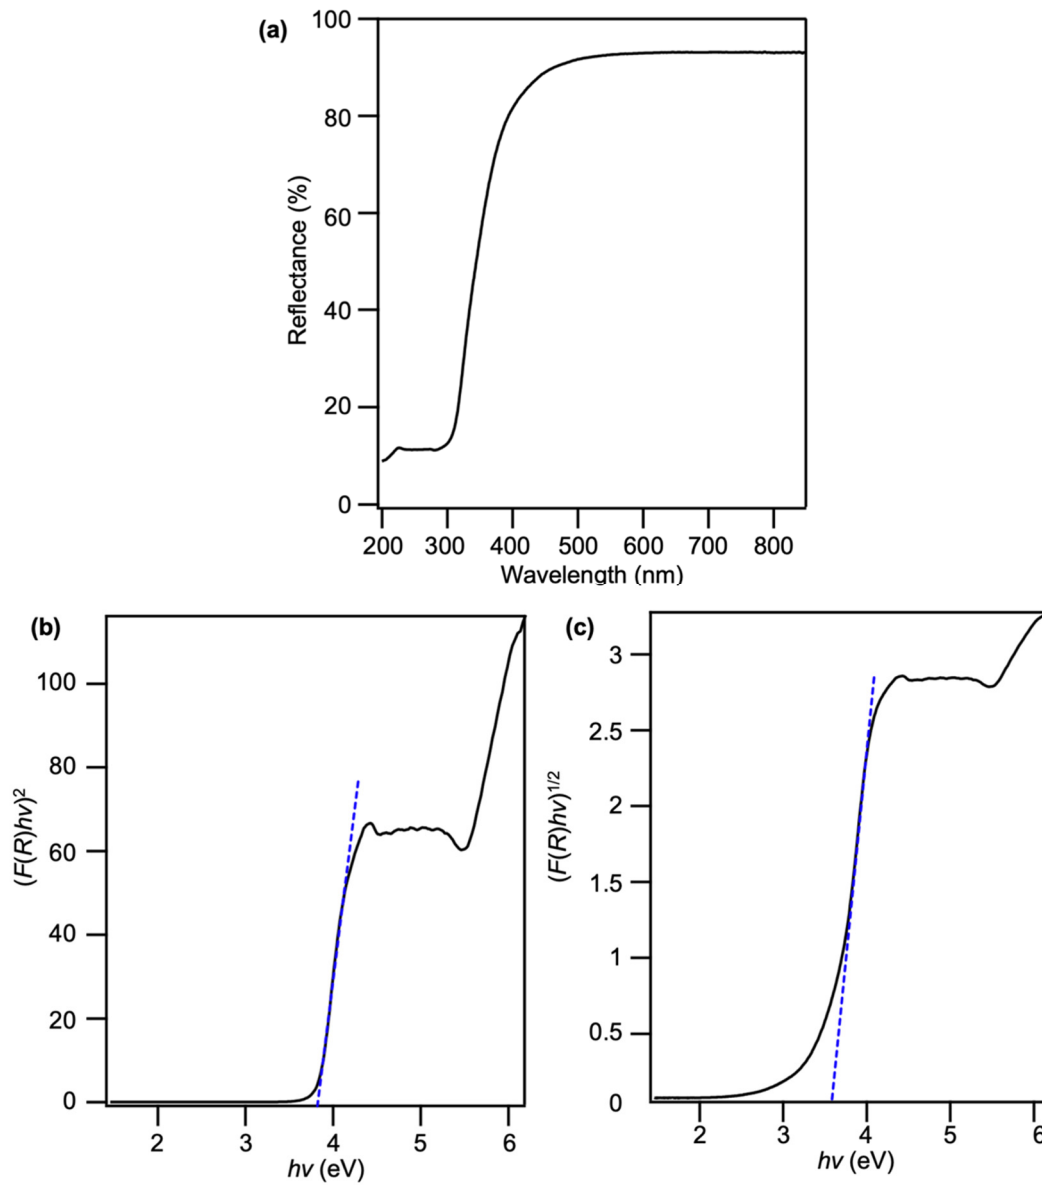

**Figure S4. Diffuse reflectance spectrum and Tauc plots of  $\text{Ba}_3\text{W}_{1.6}\text{V}_{0.4}\text{O}_{8.8}$ .** (a) Diffuse reflectance spectrum and Tauc plots for the (b) direct and (c) indirect band gaps of  $\text{Ba}_3\text{W}_{1.6}\text{V}_{0.4}\text{O}_{8.8}$ . Here  $F(R)$  is the Kubelka-Munk function. The estimated bandgaps of  $\text{Ba}_3\text{W}_{1.6}\text{V}_{0.4}\text{O}_{8.8}$  were 3.84 and 3.56 eV assuming direct and indirect transitions, respectively. The direct and indirect band gaps were 3.86 and 3.25 eV, respectively, for the mother material  $\text{Ba}_3\text{WVO}_{8.5}$ .

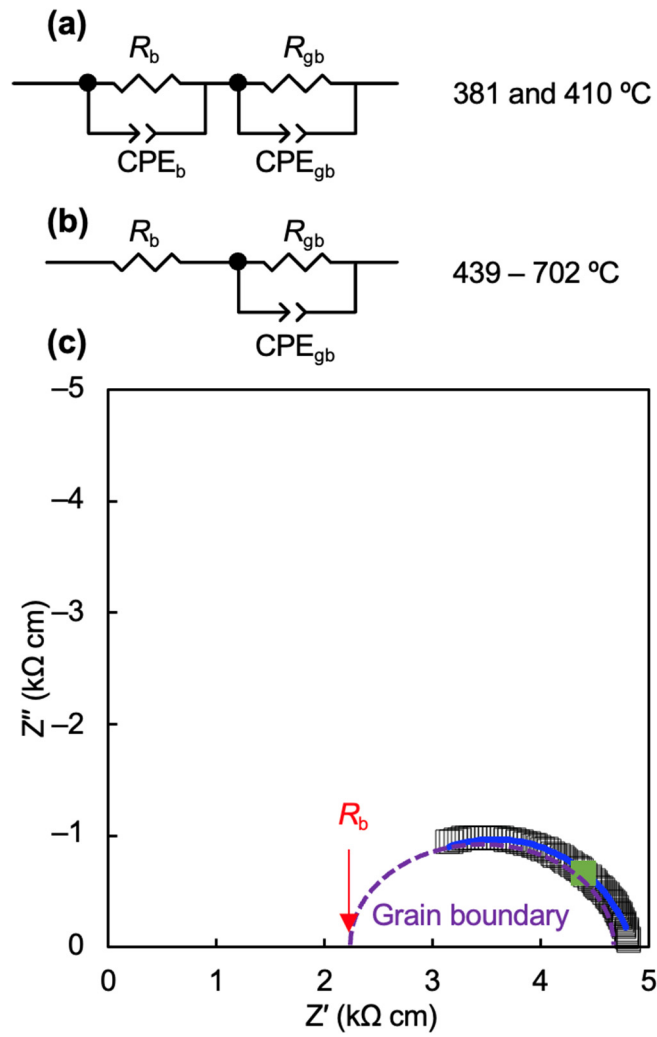

**Figure S5. Equivalent circuits and complex impedance plots of  $\text{Ba}_3\text{W}_{1.6}\text{V}_{0.4}\text{O}_{8.8}$ .** (a, b) Equivalent circuits used to model the impedance data of  $\text{Ba}_3\text{W}_{1.6}\text{V}_{0.4}\text{O}_{8.8}$  at 381–410 °C (a) and 439–702 °C (b). (c) Complex impedance plots of  $\text{Ba}_3\text{W}_{1.6}\text{V}_{0.4}\text{O}_{8.8}$  under dry air at 589 °C.

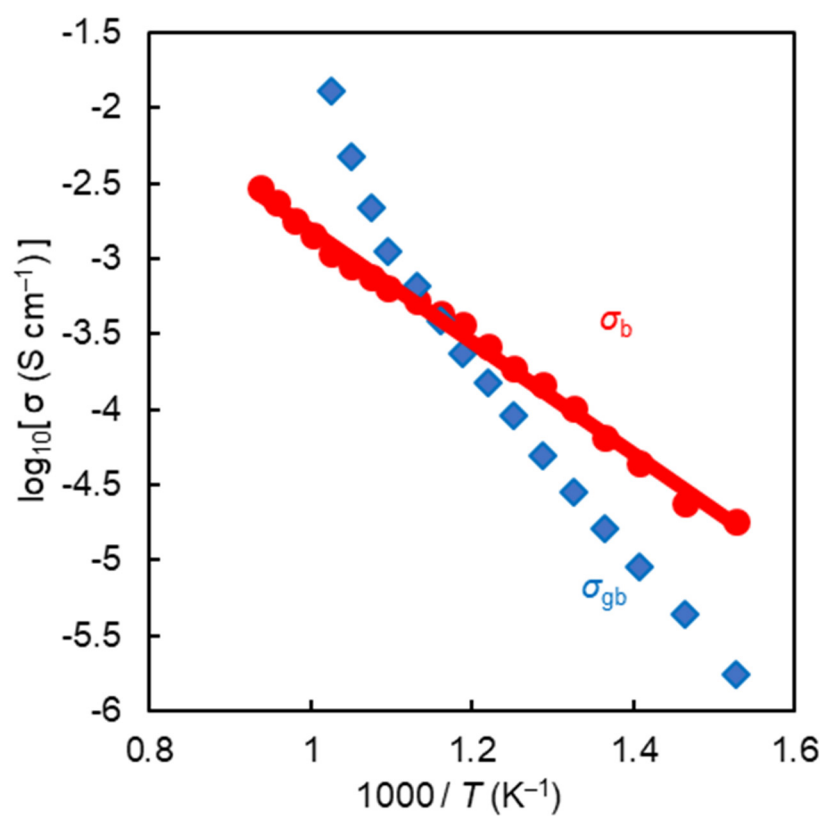

**Figure S6. Arrhenius plots of bulk and grain boundary conductivities of  $\text{Ba}_3\text{W}_{1.6}\text{V}_{0.4}\text{O}_{8.8}$ .** Arrhenius plots of bulk ( $\sigma_b$ ) and grain boundary ( $\sigma_{gb}$ ) conductivities of  $\text{Ba}_3\text{W}_{1.6}\text{V}_{0.4}\text{O}_{8.8}$  in dry air. The  $\sigma_b$  values at temperatures higher than 710 °C were estimated using the semicircular sections in the Nyquist curves.

**Table S1. Refined crystallographic parameters and reliability factors of the neutron-diffraction data of  $\text{Ba}_3\text{W}_{1.6}\text{V}_{0.4}\text{O}_{8.8}$  at 18 °C.**

| Site / Atom label                                      | Ba1       | Ba2         | W/V                                             | O1          | O2         | O3          |
|--------------------------------------------------------|-----------|-------------|-------------------------------------------------|-------------|------------|-------------|
| Atom                                                   | Ba        | Ba          | $\text{W}_{0.8}\text{V}_{0.2}$                  | O           | O          | O           |
| <i>g</i>                                               | 1         | 1           | 1                                               | 1           | 0.662(2)   | 0.0678(5)   |
| <i>x</i>                                               | 0         | 0           | 0                                               | 0.17431(5)  | 1/2        | 0.0721(6)   |
| <i>y</i>                                               | 0         | 0           | 0                                               | −0.17431(5) | 0          | 0.0085(10)  |
| <i>z</i>                                               | 0         | 0.20809(8)  | 0.39456(8)                                      | 0.10287(2)  | 0          | 0.32331(14) |
| $U_{\text{iso}}$ or $U_{\text{eq}}$ ( $\text{\AA}^2$ ) | 0.0092(3) | 0.0230(3)   | 0.0142(3)                                       | 0.01660(17) | 0.0477(7)  | 0.0050(14)  |
| $U_{11}$ ( $\text{\AA}^2$ )                            | 0.0064(5) | 0.0113(3)   |                                                 | 0.0152(2)   | 0.0368(6)  |             |
| $U_{22}$ ( $\text{\AA}^2$ )                            | 0.0064(5) | 0.0113(3)   |                                                 | 0.0152(2)   | 0.0784(15) |             |
| $U_{33}$ ( $\text{\AA}^2$ )                            | 0.0148(9) | 0.0463(8)   |                                                 | 0.0193(3)   | 0.0278(9)  |             |
| $U_{12}$ ( $\text{\AA}^2$ )                            | 0.0032(2) | 0.00566(18) |                                                 | 0.0102(3)   | 0.0392(7)  |             |
| $U_{13}$ ( $\text{\AA}^2$ )                            | 0         | 0           |                                                 | 0.00065(17) | 0.0170(5)  |             |
| $U_{23}$ ( $\text{\AA}^2$ )                            | 0         | 0           |                                                 | 0.00065(17) | 0.0340(10) |             |
| BVS                                                    | 2.37      | 2.11        | $\text{W}^{6+}: 5.91,$<br>$\text{V}^{5+}: 4.70$ | 1.98        | 1.76       | 3.11        |

Crystal system: trigonal. Space group:  $R\bar{3}m$  (No. 166, hexagonal setting).  $a = 5.81897(2)$  Å,  $c = 21.0057(2)$  Å.

Number of formula units per unit cell:  $Z = 3$ .

$g(X, s)$ : Occupancy factor of  $X$  atom at the  $s$  site.  $g(\text{Ba}; \text{Ba1}) = g(\text{Ba}; \text{Ba2}) = g(\text{W}_{0.8}\text{V}_{0.2}; \text{W/V}) = g(\text{O}; \text{O1}) = 1$ . Linear constraints for occupancy factors:  $9g(\text{O}; \text{O2}) + 36g(\text{O}; \text{O3}) = 7.5$ .

$U(X, s) = U(s) = U$ : Atomic displacement parameter (ADP) of  $X$  atom at the  $s$  site.  $U_{\text{iso}}$ : Isotropic ADP.  $U_{\text{eq}}$ : Equivalent isotropic ADP.

BVS: Bond-valence sum values were calculated using the bond-valence parameters after Adams and Rao (2011) [4].

Reliability factors:  $R_{\text{wp}} = 5.142\%$ ,  $R_{\text{p}} = 3.778\%$ ,  $R_{\text{B}} = 4.744\%$ ,  $R_{\text{F}} = 3.943\%$ . Goodness of Fit GoF = 11.092.

In a preliminary analysis, the refined occupancy factor of W,  $g(\text{W}; \text{W/V})$  was equal to 0.8 within three estimated standard deviation, thus, the  $g(\text{W}; \text{W/V})$  value was fixed to 0.8 in the final refinement. The weight fraction of hexagonal  $\text{Ba}_3\text{W}_{1.6}\text{V}_{0.4}\text{O}_{8.8}$  phase was 99.6%.



**Table S2. Refined crystallographic parameters and reliability factors of the neutron-diffraction data of Ba<sub>3</sub>WVO<sub>8.5</sub> at 18 °C.**

| Site / Atom label                                                   | Ba1        | Ba2        | W/V                                               | O1          | O2         | O3          |
|---------------------------------------------------------------------|------------|------------|---------------------------------------------------|-------------|------------|-------------|
| Atom                                                                | Ba         | Ba         | W <sub>0.5</sub> V <sub>0.5</sub>                 | O           | O          | O           |
| <i>g</i>                                                            | 1          | 1          | 1                                                 | 1           | 0.415(2)   | 0.1046(5)   |
| <i>x</i>                                                            | 0          | 0          | 0                                                 | 0.17350(8)  | 1/2        | 0.0499(12)  |
| <i>y</i>                                                            | 0          | 0          | 0                                                 | −0.17350(8) | 0          | 1.02(3)     |
| <i>z</i>                                                            | 0          | 0.20586(8) | 0.39185(12)                                       | 0.10196(3)  | 0          | 0.32614(12) |
| <i>U</i> <sub>iso</sub> or <i>U</i> <sub>eq</sub> (Å <sup>2</sup> ) | 0.0147(4)  | 0.0187(3)  | 0.0044(5)                                         | 0.0180(2)   | 0.0669(16) | 0.0324(16)  |
| <i>U</i> <sub>11</sub> (Å <sup>2</sup> )                            | 0.0108(6)  | 0.0178(4)  |                                                   | 0.0161(2)   | 0.0593(16) |             |
| <i>U</i> <sub>22</sub> (Å <sup>2</sup> )                            | 0.0108(6)  | 0.0178(4)  |                                                   | 0.0161(2)   | 0.085(3)   |             |
| <i>U</i> <sub>33</sub> (Å <sup>2</sup> )                            | 0.0223(11) | 0.0207(8)  |                                                   | 0.0219(4)   | 0.057(2)   |             |
| <i>U</i> <sub>12</sub> (Å <sup>2</sup> )                            | 0.0054(3)  | 0.0089(2)  |                                                   | 0.0106(3)   | 0.0423(17) |             |
| <i>U</i> <sub>13</sub> (Å <sup>2</sup> )                            | 0          | 0          |                                                   | 0.0013(2)   | 0.0294(12) |             |
| <i>U</i> <sub>23</sub> (Å <sup>2</sup> )                            | 0          | 0          |                                                   | −0.0013(2)  | 0.059(2)   |             |
| BVS                                                                 | 2.20       | 2.06       | W <sup>6+</sup> : 6.44,<br>V <sup>5+</sup> : 4.87 | 1.84        | 1.77       | 3.49        |

Crystal system: trigonal. Space group:  $R\bar{3}m$  (No. 166, hexagonal setting).  $a = 5.81918(4)$  Å,  $c = 21.1336(4)$  Å.

Number of formula units per unit cell:  $Z = 3$ .

$g(X, s)$ : Occupancy factor of  $X$  atom at the  $s$  site.  $g(\text{Ba}; \text{Ba1}) = g(\text{Ba}; \text{Ba2}) = g(\text{W}_{0.5}\text{V}_{0.5}; \text{W/V}) = g(\text{O}; \text{O1}) = 1$ . Linear constraints for occupancy factors:  $9g(\text{O}; \text{O2}) + 36g(\text{O}; \text{O3}) = 7.5$ .

$U(X, s) = U(s) = U$ : Atomic displacement parameter (ADP) of  $X$  atom at the  $s$  site.  $U_{\text{iso}}$ : Isotropic ADP.  $U_{\text{eq}}$ : Equivalent isotropic ADP.

BVS: Bond-valence sum values were calculated using the bond-valence parameters after Adams and Rao (2011) [4].

Reliability factors:  $R_{\text{wp}} = 5.074\%$ ,  $R_{\text{p}} = 3.943\%$ ,  $R_{\text{B}} = 4.724\%$ ,  $R_{\text{F}} = 3.713\%$ . Goodness of Fit GoF = 10.439.

**Table S3. Refined crystallographic parameters and reliability factors of the neutron-diffraction data of  $\text{Ba}_3\text{W}_{1.6}\text{V}_{0.4}\text{O}_{8.8}$  at 800 °C.**

| Site / Atom label                                      | Ba1        | Ba2         | W/V                                              | O1          | O2         | O3         |
|--------------------------------------------------------|------------|-------------|--------------------------------------------------|-------------|------------|------------|
| Atom                                                   | Ba         | Ba          | $\text{W}_{0.8}\text{V}_{0.2}$                   | O           | O          | O          |
| <i>g</i>                                               | 1          | 1           | 1                                                | 1           | 0.6650(16) | 0.0688(4)  |
| <i>x</i>                                               | 0          | 0           | 0                                                | 0.17630(8)  | 1/2        | 0.0721(11) |
| <i>y</i>                                               | 0          | 0           | 0                                                | −0.17630(8) | 0          | 0.0765(9)  |
| <i>z</i>                                               | 0          | 0.20723(13) | 0.39531(12)                                      | 0.10199(4)  | 0          | 0.3218(2)  |
| $U_{\text{iso}}$ or $U_{\text{eq}}$ ( $\text{\AA}^2$ ) | 0.0251(6)  | 0.0435(5)   | 0.0243(5)                                        | 0.0434(3)   | 0.1095(12) | 0.0197(18) |
| $U_{11}$ ( $\text{\AA}^2$ )                            | 0.0239(9)  | 0.0354(7)   | 0.0185(6)                                        | 0.0459(5)   | 0.0783(12) |            |
| $U_{22}$ ( $\text{\AA}^2$ )                            | 0.0239(9)  | 0.0354(7)   | 0.0185(6)                                        | 0.0459(5)   | 0.186(2)   |            |
| $U_{33}$ ( $\text{\AA}^2$ )                            | 0.0275(14) | 0.0596(14)  | 0.0359(16)                                       | 0.0386(6)   | 0.064(2)   |            |
| $U_{12}$ ( $\text{\AA}^2$ )                            | 0.0119(4)  | 0.0177(3)   | 0.0093(3)                                        | 0.0367(6)   | 0.0930(14) |            |
| $U_{13}$ ( $\text{\AA}^2$ )                            | 0          | 0           | 0                                                | 0.0010(2)   | 0.0372(11) |            |
| $U_{23}$ ( $\text{\AA}^2$ )                            | 0          | 0           | 0                                                | −0.0010(2)  | 0.075(2)   |            |
| BVS                                                    | 2.37       | 2.11        | $\text{W}^{6+}$ : 5.90<br>$\text{V}^{5+}$ : 4.70 | 1.98        | 1.76       | 3.11       |

Crystal system: trigonal. Space group:  $R\bar{3}m$  (No. 166, hexagonal setting).  $a = 5.91775(4)$  Å,  $c = 21.2366(4)$  Å.

Number of formula units per unit cell:  $Z = 3$ .

$g(X, s)$ : Occupancy factor of  $X$  atom at the  $s$  site.  $g(\text{Ba}; \text{Ba1}) = g(\text{Ba}; \text{Ba2}) = g(\text{W}_{0.8}\text{V}_{0.2}; \text{W/V}) = g(\text{O}; \text{O1}) = 1$ . Linear constraints for occupancy factors:  $9g(\text{O}; \text{O2}) + 36g(\text{O}; \text{O3}) = 7.5$ .

$U(X, s) = U(s) = U$ : Atomic displacement parameter (ADP) of  $X$  atom at the  $s$  site.  $U_{\text{iso}}$ : Isotropic ADP.  $U_{\text{eq}}$ : Equivalent isotropic ADP.

BVS: Bond-valence sum values were calculated using the bond-valence parameters after Adams and Rao (2011) [4].

Reliability factors:  $R_{\text{wp}} = 4.304\%$ ,  $R_{\text{p}} = 3.063\%$ ,  $R_{\text{B}} = 4.953\%$ ,  $R_{\text{F}} = 3.707\%$ . Goodness of Fit  $\text{GoF} = 9.411$ .

**Table S4. Refined crystallographic parameters and reliability factors of the neutron-diffraction data of Ba<sub>3</sub>WVO<sub>8.5</sub> at 800 °C.**

| Site / Atom label                                                   | Ba1        | Ba2         | W/V                                              | O1          | O2        | O3         |
|---------------------------------------------------------------------|------------|-------------|--------------------------------------------------|-------------|-----------|------------|
| Atom                                                                | Ba         | Ba          | W <sub>0.5</sub> V <sub>0.5</sub>                | O           | O         | O          |
| <i>g</i>                                                            | 1          | 1           | 1                                                | 1           | 0.435(7)  | 0.0961(18) |
| <i>x</i>                                                            | 0          | 0           | 0                                                | 0.17585(10) | 1/2       | 0.0684(12) |
| <i>y</i>                                                            | 0          | 0           | 0                                                | 0.82413(10) | 0         | 0.063(2)   |
| <i>z</i>                                                            | 0          | 0.20642(13) | 0.3926(2)                                        | 0.10159(5)  | 0         | 0.3263(2)  |
| <i>U</i> <sub>iso</sub> or <i>U</i> <sub>eq</sub> (Å <sup>2</sup> ) | 0.0349(8)  | 0.0445(6)   | 0.0326(11)                                       | 0.0502(5)   | 0.125(6)  | 0.037(3)   |
| <i>U</i> <sub>11</sub> (Å <sup>2</sup> )                            | 0.0377(13) | 0.0443(9)   | 0.0179(14)                                       | 0.0510(6)   | 0.100(3)  |            |
| <i>U</i> <sub>22</sub> (Å <sup>2</sup> )                            | 0.0377(13) | 0.0443(9)   | 0.0179(14)                                       | 0.0510(6)   | 0.198(13) |            |
| <i>U</i> <sub>33</sub> (Å <sup>2</sup> )                            | 0.0292(18) | 0.0446(17)  | 0.062(3)                                         | 0.0484(7)   | 0.078(4)  |            |
| <i>U</i> <sub>12</sub> (Å <sup>2</sup> )                            | 0.0189(6)  | 0.0222(4)   | 0.0090(7)                                        | 0.0386(8)   | 0.099(6)  |            |
| <i>U</i> <sub>13</sub> (Å <sup>2</sup> )                            | 0          | 0           | 0                                                | 0.0018(3)   | 0.044(3)  |            |
| <i>U</i> <sub>23</sub> (Å <sup>2</sup> )                            | 0          | 0           | 0                                                | −0.0018(3)  | 0.088(6)  |            |
| BVS                                                                 | 2.07       | 1.86        | W <sup>6+</sup> : 6.21<br>V <sup>5+</sup> : 4.78 | 1.77        | 1.63      | 3.09       |

Crystal system: trigonal. Space group:  $R\bar{3}m$  (No. 166, hexagonal setting).  $a = 5.90973(9)$  Å,  $c = 21.3120(8)$  Å.

Number of formula units per unit cell:  $Z = 3$ .

$g(X, s)$ : Occupancy factor of  $X$  atom at the  $s$  site.  $g(\text{Ba}; \text{Ba1}) = g(\text{Ba}; \text{Ba2}) = g(\text{W}_{0.8}\text{V}_{0.2}; \text{W/V}) = g(\text{O}; \text{O1}) = 1$ . Linear constraints for occupancy factors:  $9g(\text{O}; \text{O2}) + 36g(\text{O}; \text{O3}) = 7.5$ .

$U(X, s) = U(s) = U$ : Atomic displacement parameter (ADP) of  $X$  atom at the  $s$  site.  $U_{\text{iso}}$ : Isotropic ADP.  $U_{\text{eq}}$ : Equivalent isotropic ADP.

BVS: Bond-valence sum values were calculated using the bond-valence parameters after Adams and Rao (2011) [4].

Reliability factors:  $R_{\text{wp}} = 3.294\%$ ,  $R_{\text{p}} = 2.515\%$ ,  $R_{\text{B}} = 4.882\%$ ,  $R_{\text{F}} = 4.831\%$ . Goodness of Fit GoF = 4.220.

### **Supplementary Note: Influence of BaWO<sub>4</sub> impurity on the electrical conductivity of Ba<sub>3</sub>W<sub>1.6</sub>V<sub>0.4</sub>O<sub>8.8</sub>**

In the literature, the BaWO<sub>4</sub> phase is reported to be a p-type electronic conductor.<sup>5</sup> We have not observed the p-type electronic conduction in the oxygen partial pressure dependence of electrical conductivity (Fig. 2a in the text), thus, the influence of BaWO<sub>4</sub> impurity phase on the electrical conductivity of the  $x = 0.6$  sample is negligible.

## References

1. Światowska-Mrowiecka, J.; Maurice, V.; Zanna, S.; Klein, L.; Marcus, P. XPS Study of Li Ion Intercalation in  $V_2O_5$  Thin Films Prepared by Thermal Oxidation of Vanadium Metal. *Electrochim. Acta* **2007**, *52*, 5644–5653, doi:10.1016/J.ELECTACTA.2006.12.050.
2. Fleisch, T.H.; Mains, G.J. An XPS Study of the UV Reduction and Photochromism of  $MoO_3$  and  $WO_3$ . *J. Chem. Phys.* **1982**, *76*, 780–786, doi:10.1063/1.443047.
3. Khyzhun, O.Y. XPS, XES and XAS Studies of the Electronic Structure of Tungsten Oxides. *J. Alloys Compd.* **2000**, *305*, 1–6, doi:10.1016/S0925-8388(00)00697-6.
4. Adams, S.; Rao, R.P. High Power Lithium Ion Battery Materials by Computational Design. *Phys. status solidi* **2011**, *208*, 1746–1753, doi:10.1002/pssa.201001116.
5. Sahmi, A.; Omeiri, S.; Bensadok, K.; Trari, M. Electrochemical properties of the scheelite  $BaWO_4$  prepared by co-precipitation: Application to electro-photocatalysis of ibuprofen degradation. *Mater. Sci. Semicond. Process.* **2019**, *91*, 108–114, doi: 10.1016/j.mssp.2018.11.017.
